# Supplementary material for: Hallucinations Predict Relapse After Discontinuation of Risperidone in Patients With Alzheimer’s Disease and Psychosis or Agitation
Source: Atypon-hosted journal article supplement (doi:10.1176/appi.ajp.2016.16111314), 2017-04-01
Supplement: erratum.pdf [file erratum.pdf]

## Correction

In the editorial “Hallucinations Predict Relapse After Discontinuation of Risperidone in Patients With Alzheimer’s Disease and Psychosis or Agitation” by Helen Lavretsky, M.D., M.S. (<http://dx.doi.org/10.1176/appi.ajp.2016.16111314>) published in the April 2017 issue of the Journal, the first sentence of the last paragraph should have specified auditory, not visual, hallucinations as indicating a high risk of relapse. The online edition was corrected on May 2, 2017.
